# Supplementary material for: Polyester networks from structurally similar monomers: recyclable-by-design and upcyclable to photopolymers
Source: Royal Society of Chemistry journal article supplement (doi:10.1039/d3py00338h), 2023-01-01
Supplement: d3py00338h1.pdf [file d3py00338h1.pdf]

## Supporting Information

# **Polyester Networks from Structurally Similar Monomers: Recyclable-by-Design and Upcycling to Photopolymers**

*Grant M. Musgrave<sup>a</sup>, Katie M. Bishop<sup>a,b</sup>, John S. Kim<sup>a,c</sup>, Amelia C. Heiner<sup>a</sup>, and Chen Wang<sup>a†</sup>*

<sup>a</sup> Department of Materials Science and Engineering, University of Utah, Salt Lake City, Utah 84112, USA

<sup>b</sup> Department of Civil and Environmental Engineering, Utah State University, Logan, Utah 84322, USA

<sup>c</sup> Department of Chemical Engineering, Arizona State University, Tempe, Arizona 85287, USA

## **Experimental section**

### ***Materials***

Dimethyl phthalate (DMPH), phthalic anhydride (PHA), allyl alcohol (allyl-OH), 1-butanol, 1-hexanol, lithium carbonate ( $\text{Li}_2\text{CO}_3$ ), sodium carbonate ( $\text{Na}_2\text{CO}_3$ ), potassium carbonate ( $\text{K}_2\text{CO}_3$ ), rubidium carbonate ( $\text{Rb}_2\text{CO}_3$ ), cesium carbonate ( $\text{Cs}_2\text{CO}_3$ ), diallyl phthalate (DAPH), diethyl phthalate, phthalate chloride, sodium sulfate, diphenyl (2,4,6-trimethylbenzoyl)phosphine oxide (TPO), 1,2-cyclohexanedicarboxylic anhydride, 1,3,5-Trimethoxybenzene (TMB), and 2-ethyl-4-methylimidazole (EMI) were purchased from Sigma-Aldrich. Pentaerythritol tetra(3-mercaptopropionate) (PETMP) was donated by Bruno Bock. Diglycidyl phthalate (DGPH) was donated by Nagase under the tradename EX-721. Diglycidyl 1,2-cyclohexanedicarboxylate was purchased from TCI. All other chemicals were used as received without additional purification.

### ***General procedure of epoxy-anhydride polymerization***

The PHA, DGPH, and PHMEA (if needed) were mixed based on the stoichiometric ratios given in Table 1. The mixture was heated to approximately 150 °C and was subsequently, subjected to SpeedMixer® at 3000 rpm for 30 s to obtain homogeneity. EMI (1 wt% with respect to the monomers) was then added to the mixture. Note that whenever the PHA crashed out from the mixture, additional heating and speed-mixing was employed. The resin was cast into various silicone molds and was kept in an oven at 130 °C for 2 h. For cyclohexane dicarboxylate systems, the resin was kept in an oven at 80 °C for 5 h. Resin was made in batches that varied from 1g to 25g.

### ***General procedure of synthesizing phthalic mono-ester mono-acid***

To a 250 mL round bottom flask, 7.4 g PHA (50 mmol) and 50 mL of an alcohol reagent were added. The flask was then equipped with a condenser with an  $\text{N}_2$  balloon and was submerged in an oil bath. The mixture was kept at 80 °C with rigorous magnetic stirring overnight. No catalyst or other reagents were employed. The mono-ester product was isolated by removing the alcohol reagent by a rotary evaporator and subsequently, put under a high vacuum. The product was found sufficiently pure without further purification. This procedure has been applied using methanol, ethanol, and 1-butanol.

### ***General procedure of degradation by transesterification reactions***

Discs were cast from resin into a silicone mold with a diameter of 10 mm and a thickness of 2 mm. The polymer samples were weighed and then submerged in 10 mL methanol or allyl alcohol with 0.5 g  $\text{K}_2\text{CO}_3$  as catalyst for a saturated solution. For degradation experiments comparing the different carbonate salts, the molar ratio of methanol to salt was fixed at 1:400. Excess solvent and catalyst were used to show proof of concept, as the solubility of  $\text{K}_2\text{CO}_3$  in the chosen

solvents was lower than 0.05 g/mL. At each time point, samples were taken out of the solution and were weighed after physically drying the surface with a Kim wipe.

### ***Procedure of small-molecule transesterification reactions***

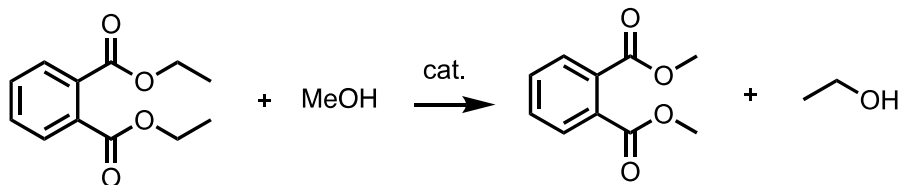

Scheme 1: Transesterification of Diethyl Phthalate via methanol

A group 1 carbonate salt catalyst (i.e. Na<sub>2</sub>CO<sub>3</sub>, K<sub>2</sub>CO<sub>3</sub>, Rb<sub>2</sub>CO<sub>3</sub>, or Cs<sub>2</sub>CO<sub>3</sub>), diethyl Phthalate, and methanol were mixed in molar ratios of 1:20:400. The solutions were kept at room temperature and were magnetically stirred. Samples of the solution were taken at various times to monitor the conversion of diethyl phthalate via <sup>1</sup>H NMR. The effectiveness of the catalysts was compared to the control group, which had no catalyst included in the methanol solution.

### ***General procedure of preparing thiol-ene photopolymer***

Diallyl phthalate and PETMP were mixed in stoichiometric amount between thiol groups and alkene groups, and subsequently, 1 wt% TPO (with respect to the total monomers) was added. The mixture was homogenized by using a SpeedMixer®. The mixture was cast in silicone molds with the desired geometry. The casted resin was exposed to 405 nm light by an Anycubic Wash and Cure Station for 30 m.

### ***Characterization methods***

Dynamic Mechanical Analysis (**DMA**) tests were conducted on a TA DHR-20 with oscillatory force applied in the axial direction. Rectangular bars of 30 mm x 5 mm x 1 mm (LxWxT) were fabricated by curing in a silicone mold. The samples were tested with 0.1% axial strain at a frequency of 1 Hz, ramping from 40 °C to 200 °C at 3 °C/min. An axial gap limit of 3 mm was set. Glass transition temperature (T<sub>g</sub>) was determined by the highest point on the tan δ curve. Rubbery modulus was determined by the storage modulus (E') at T<sub>g</sub> + 40 °C. The samples were tested within 24 hours after being annealed at 150 °C for at least 1 h.

Differential Scanning Calorimetry (**DSC**) tests were conducted on a NETZSCH 3500 Sirius. Samples underwent three heat-cool cycles and the T<sub>g</sub> was determined using the second heating cycles. The temperature ramped from 40 °C to 200 °C at 10 °C/min.

Fourier transform infrared spectroscopy (**FT-IR**) spectra were collected on a Nicolet iS50 spectrometer equipped with a single-bounce Smart iTR Attenuated Total Reflectance (ATR) setup. DTGS-KBr was used as the detector, and the air was used as the background. Spectra

were collected from  $4000\text{ cm}^{-1}$  to  $600\text{ cm}^{-1}$ . Polymer samples were made into a thin film to achieve sufficient contact with the ATR window.

$^1\text{H}$  NMR spectra were collected on a Bruker Avance NEO 500 MHz.  $\text{CDCl}_3$  was used as the solvent for all spectra collected. 1,3,5-Trimethoxybenzene was used as an internal standard to calculate yield of DMPH and DAPH from degraded polymers.

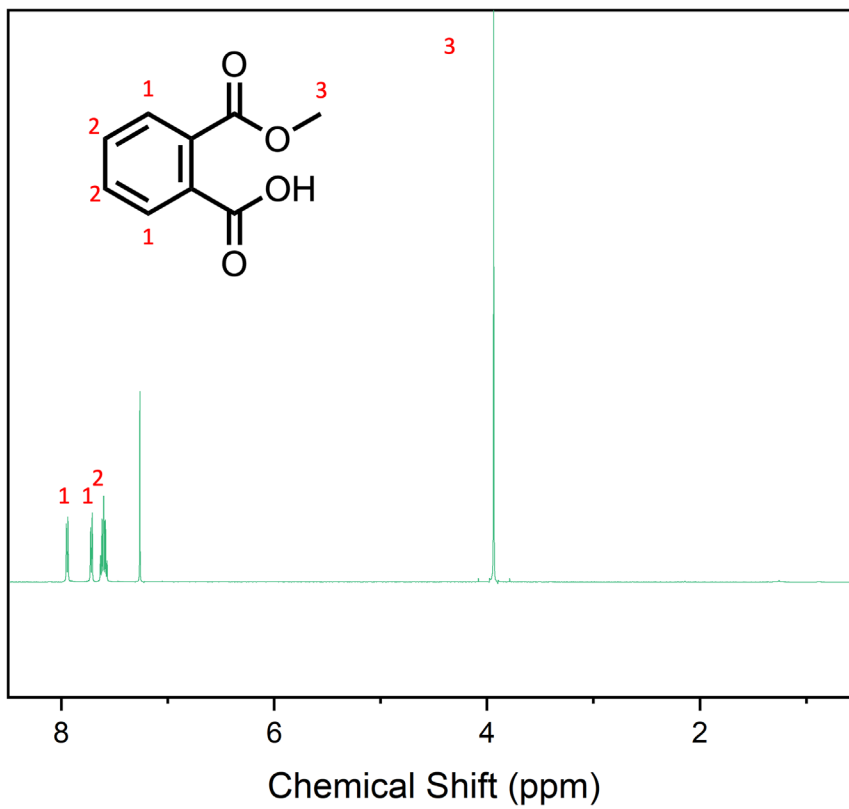

| Peak # | Chemical Shift (ppm) | Integral |
|--------|----------------------|----------|
| 1      | 7.94                 | 0.99     |
| 1      | 7.72                 | 0.98     |
| 2      | 7.60                 | 2.08     |
| 3      | 3.94                 | 3        |

Figure S1. <sup>1</sup>H NMR of monomethyl phthalate in CDCl<sub>3</sub> with respective peaks and integrals.

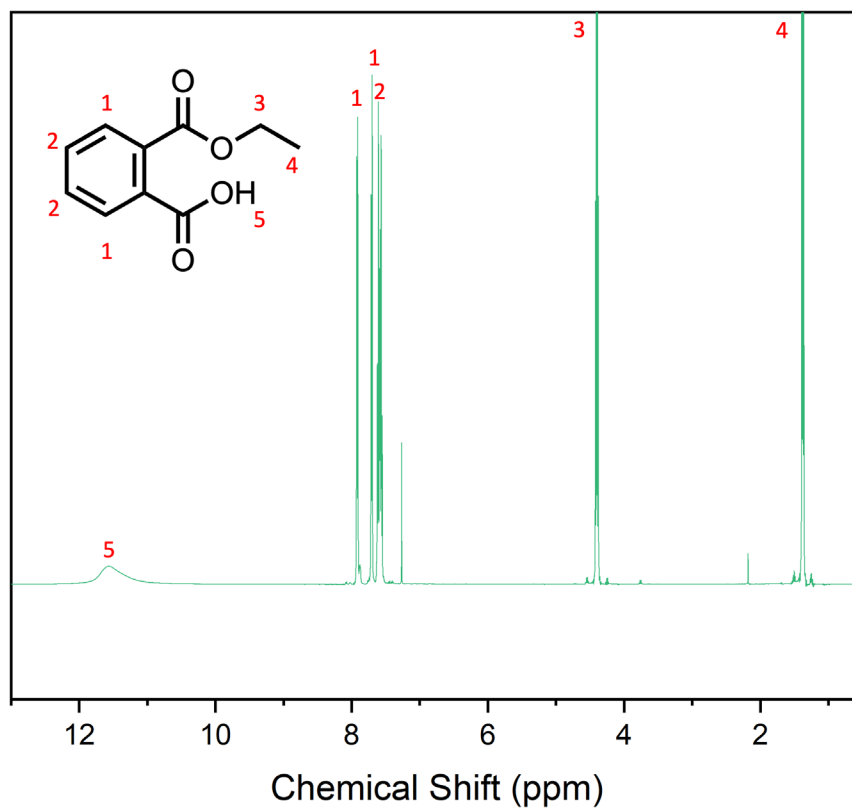

| Peak # | Chemical Shift (ppm) | Integral |
|--------|----------------------|----------|
| 1      | 7.91                 | 0.97     |
| 1      | 7.70                 | 0.97     |
| 2      | 7.58                 | 2.05     |
| 3      | 4.39                 | 2.00     |
| 4      | 1.37                 | 3.00     |
| 5      | 11.56                | 0.95     |

Figure S2. <sup>1</sup>H NMR of monoethyl phthalate in CDCl<sub>3</sub> with respective peaks and integrals.

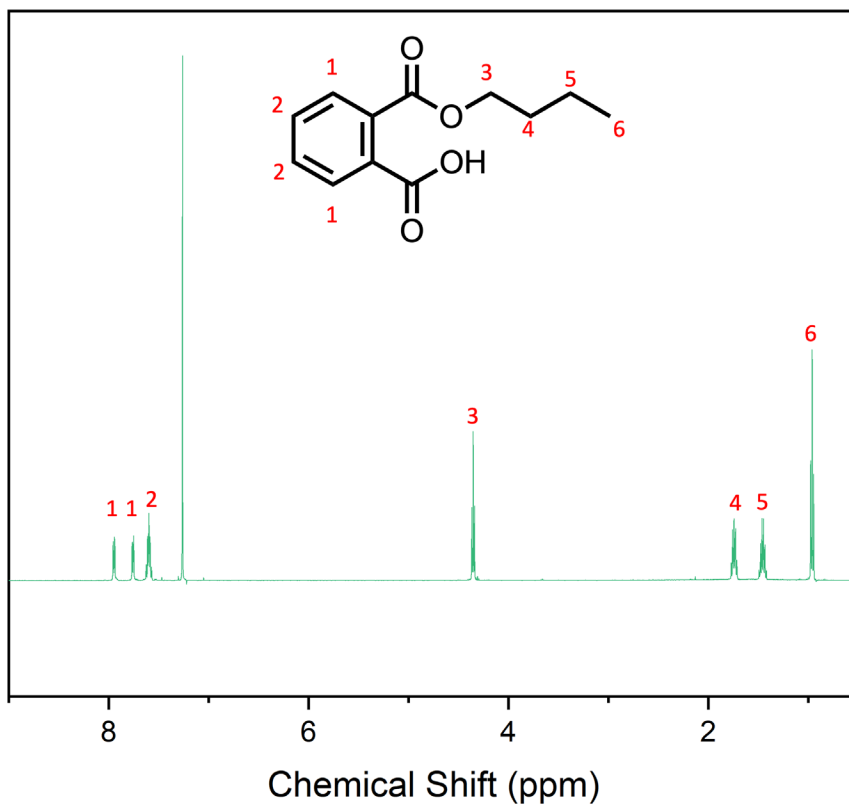

| Peak # | Chemical Shift (ppm) | Integral |
|--------|----------------------|----------|
| 1      | 7.94                 | 0.98     |
| 1      | 7.76                 | 0.97     |
| 2      | 7.60                 | 2.00     |
| 3      | 4.35                 | 2.00     |
| 4      | 1.74                 | 2.14     |
| 5      | 1.45                 | 2.15     |
| 6      | 0.96                 | 3.11     |

Figure S3. <sup>1</sup>H NMR of monobutyl phthalate in CDCl<sub>3</sub> with respective peaks and integrals.

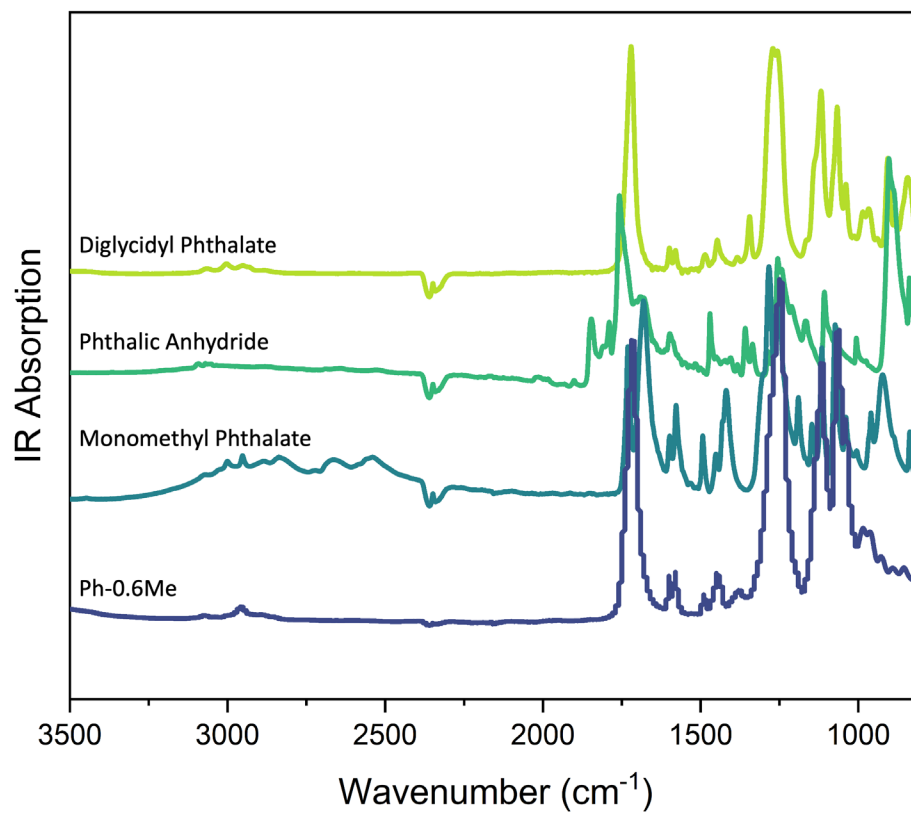

Figure S4. FT-IR spectrum of monomers and the resulting polymer for the tertiary DGPH-PHA-PHMEA system.



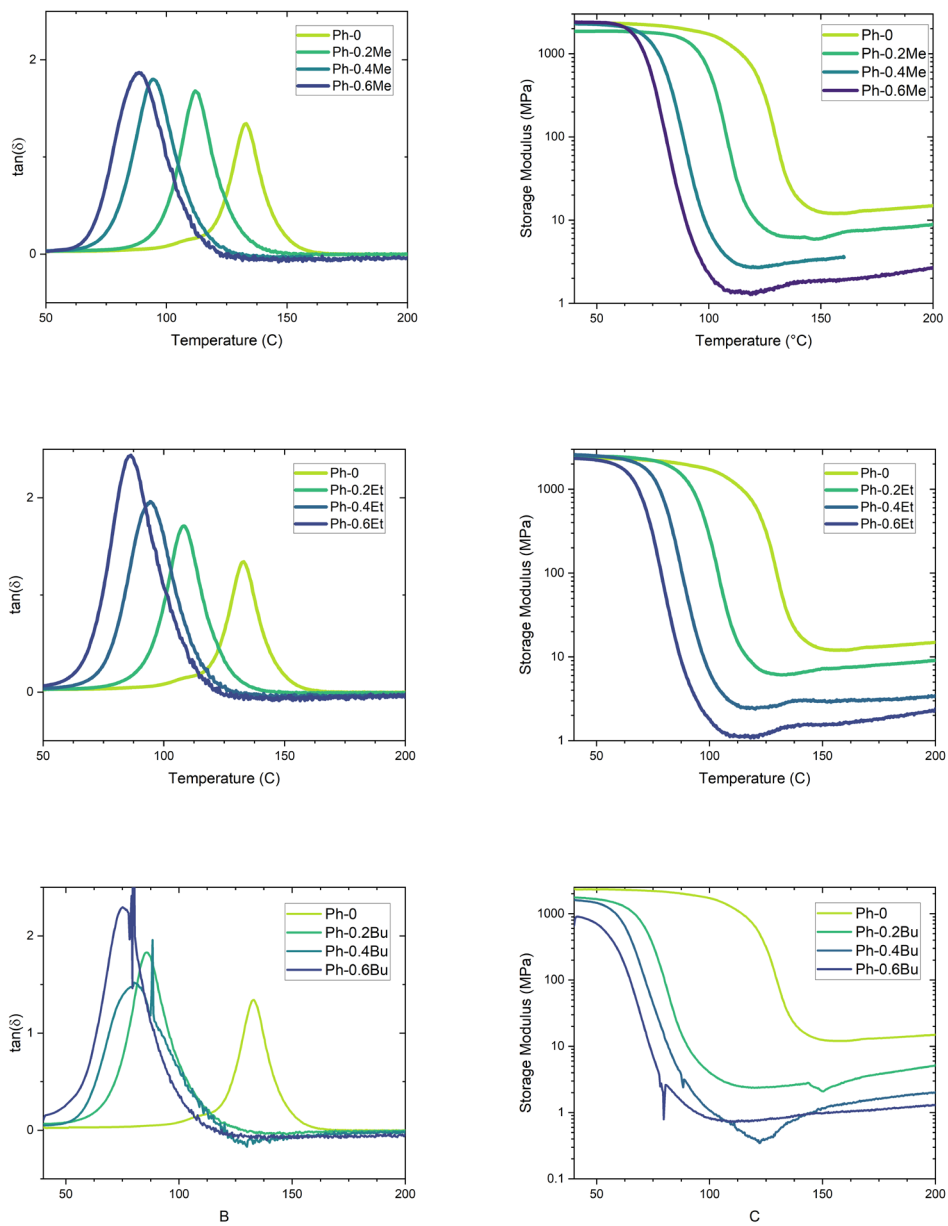

Figure S5. Entailed DMA data of PH-Me (top), PH-Et (middle), and PH-Bu (bottom) systems, including both  $\tan \delta$  (left) and storage modulus (right).

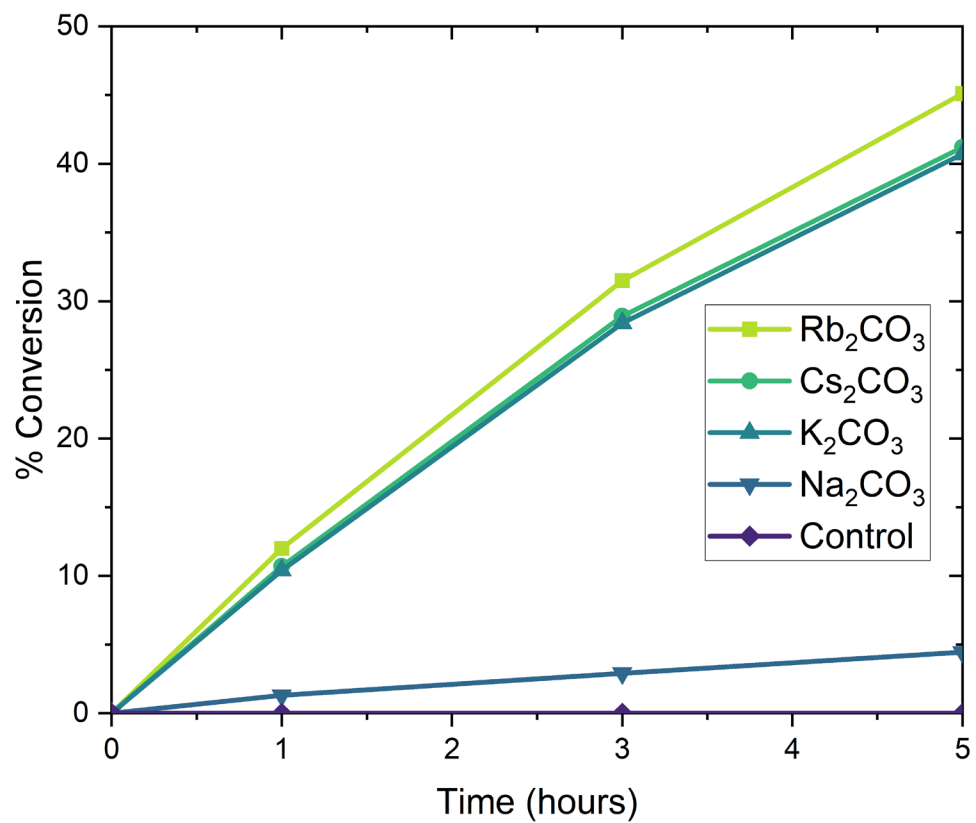

Figure S6. Conversion of diethyl phthalate in methanol using various group 1 carbonate salts. Samples for <sup>1</sup>H NMR were collected at various times to calculate conversion. Control group solution included no catalyst.

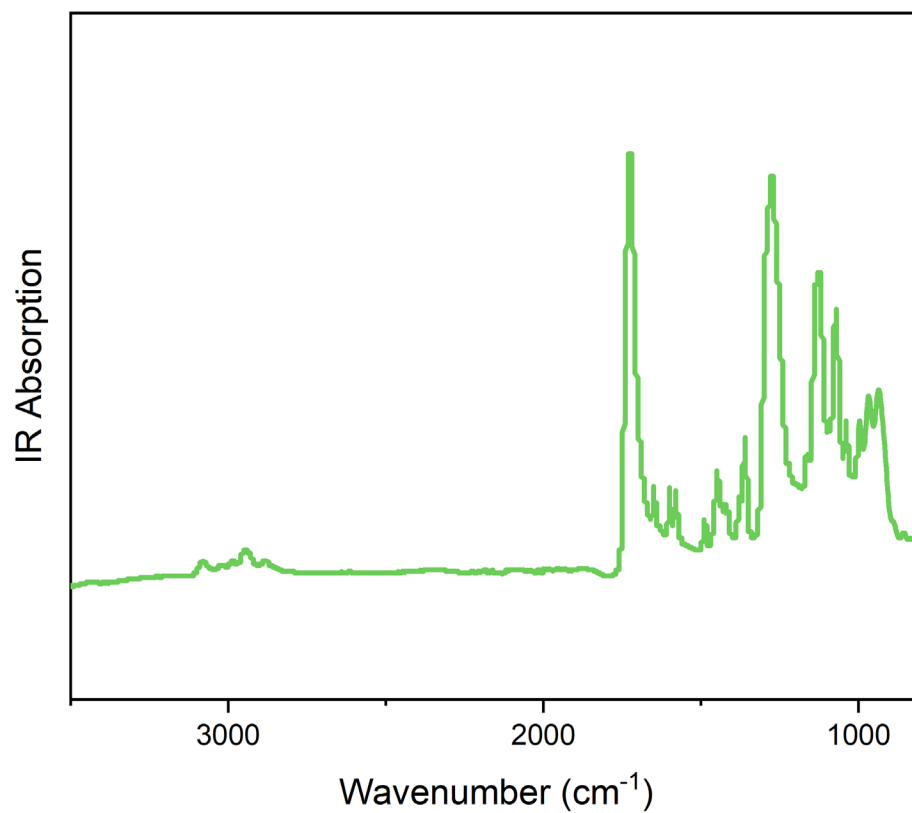

Figure S7. FT-IR spectrum of degraded Ph-0.6Me with allyl alcohol after aqueous work up

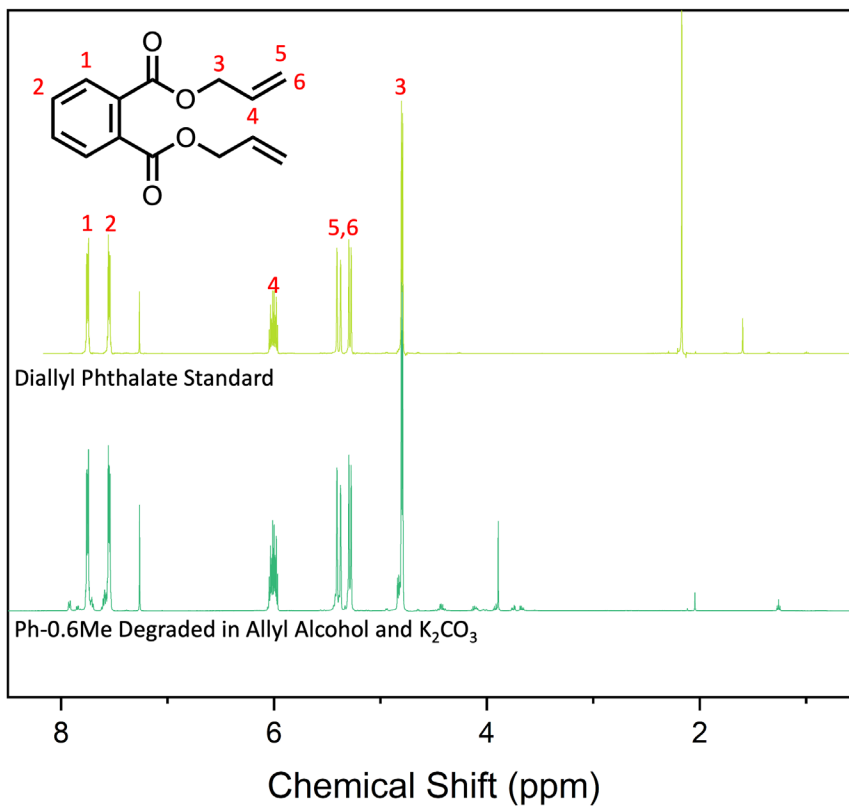

| Peak # | Chemical Shift (ppm) | Integral (Standard) | Integral (Recycled) |
|--------|----------------------|---------------------|---------------------|
| 1      | 7.75                 | 2.01                | 1.98                |
| 2      | 7.55                 | 2.05                | 2.06                |
| 4      | 6.00                 | 2.00                | 2.0                 |
| 5      | 5.39                 | 2.03                | 1.88                |
| 6      | 5.28                 | 2.03                | 1.97                |
| 3      | 4.79                 | 4.20                | 3.61                |

Figure S8. <sup>1</sup>H NMR spectrum of degraded Ph-0.6Me with allyl alcohol after aqueous work up with respective peaks and integrals of both the degraded polymer and the internal standard.

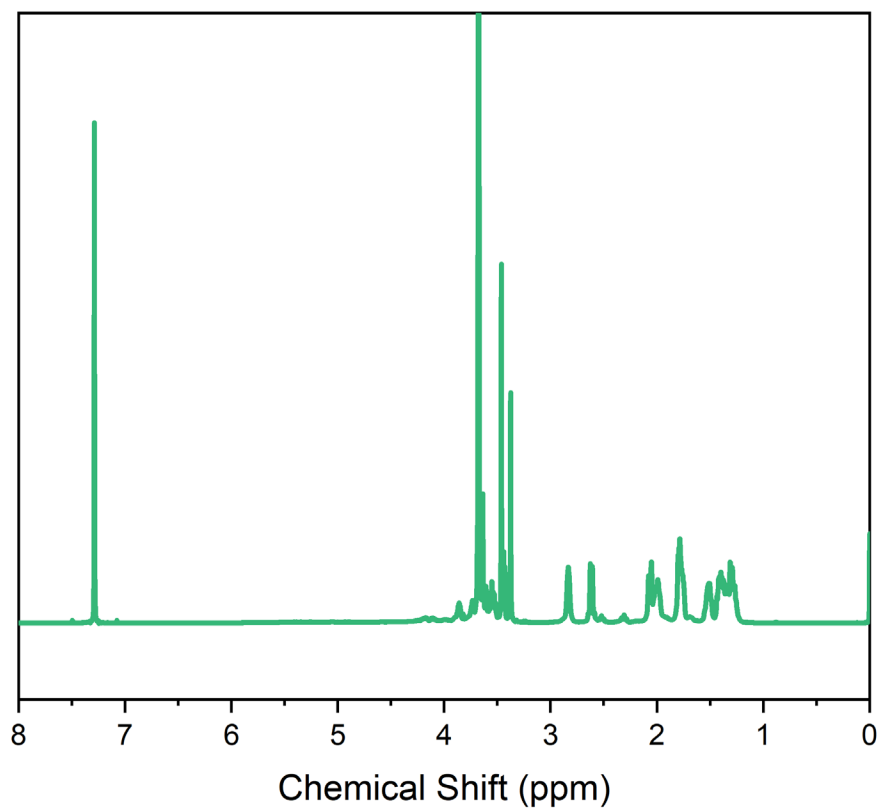

Figure S9.  $^1\text{H}$  NMR spectrum of the degraded 1,2-cyclohexane dicarboxylate-based polymer with methanol.

| <b>Polymer</b> | <b>Solvent</b> | <b>Expected Phthalate Ester</b> | <b>Initial Polymer (g)</b> | <b>Theoretical Yield of Phthalate Ester (g)</b> | <b>Actual Yield of Phthalate Ester via <sup>1</sup>H NMR</b> | <b>Percent Yield (wt %)</b> |
|----------------|----------------|---------------------------------|----------------------------|-------------------------------------------------|--------------------------------------------------------------|-----------------------------|
| PH-0.6Me       | Methanol       | DMPH                            | 0.1746                     | 0.1591                                          | 0.1036                                                       | 65.1%                       |
| PH-0.6Me       | Allyl Alcohol  | DAPH                            | 0.1999                     | 0.2310                                          | 0.1896                                                       | 82.1%                       |
| DAPH-PETMP     | Methanol       | DMPH                            | 0.1100                     | 0.0435                                          | 0.0434                                                       | 99.8%                       |

Table S1. Yields calculated via <sup>1</sup>H NMR spectrum using TMB as an internal standard. Degradation of polymers were performed at 23 °C using a saturated K<sub>2</sub>CO<sub>3</sub> alcohol solution.
